# Supplementary material for: Structure and properties of ITQ-8: a hydrous layer silicate with microporous silicate layers
Source: Royal Society of Chemistry journal article supplement (doi:10.1039/c6dt00713a), 2016-01-01

$^{19}\text{F}$  MAS NMR spectrum of ITQ-8 presenting three weak signals around ca. -123 ppm which are indicative of free fluoride ions.  
\* = spinning side bands.

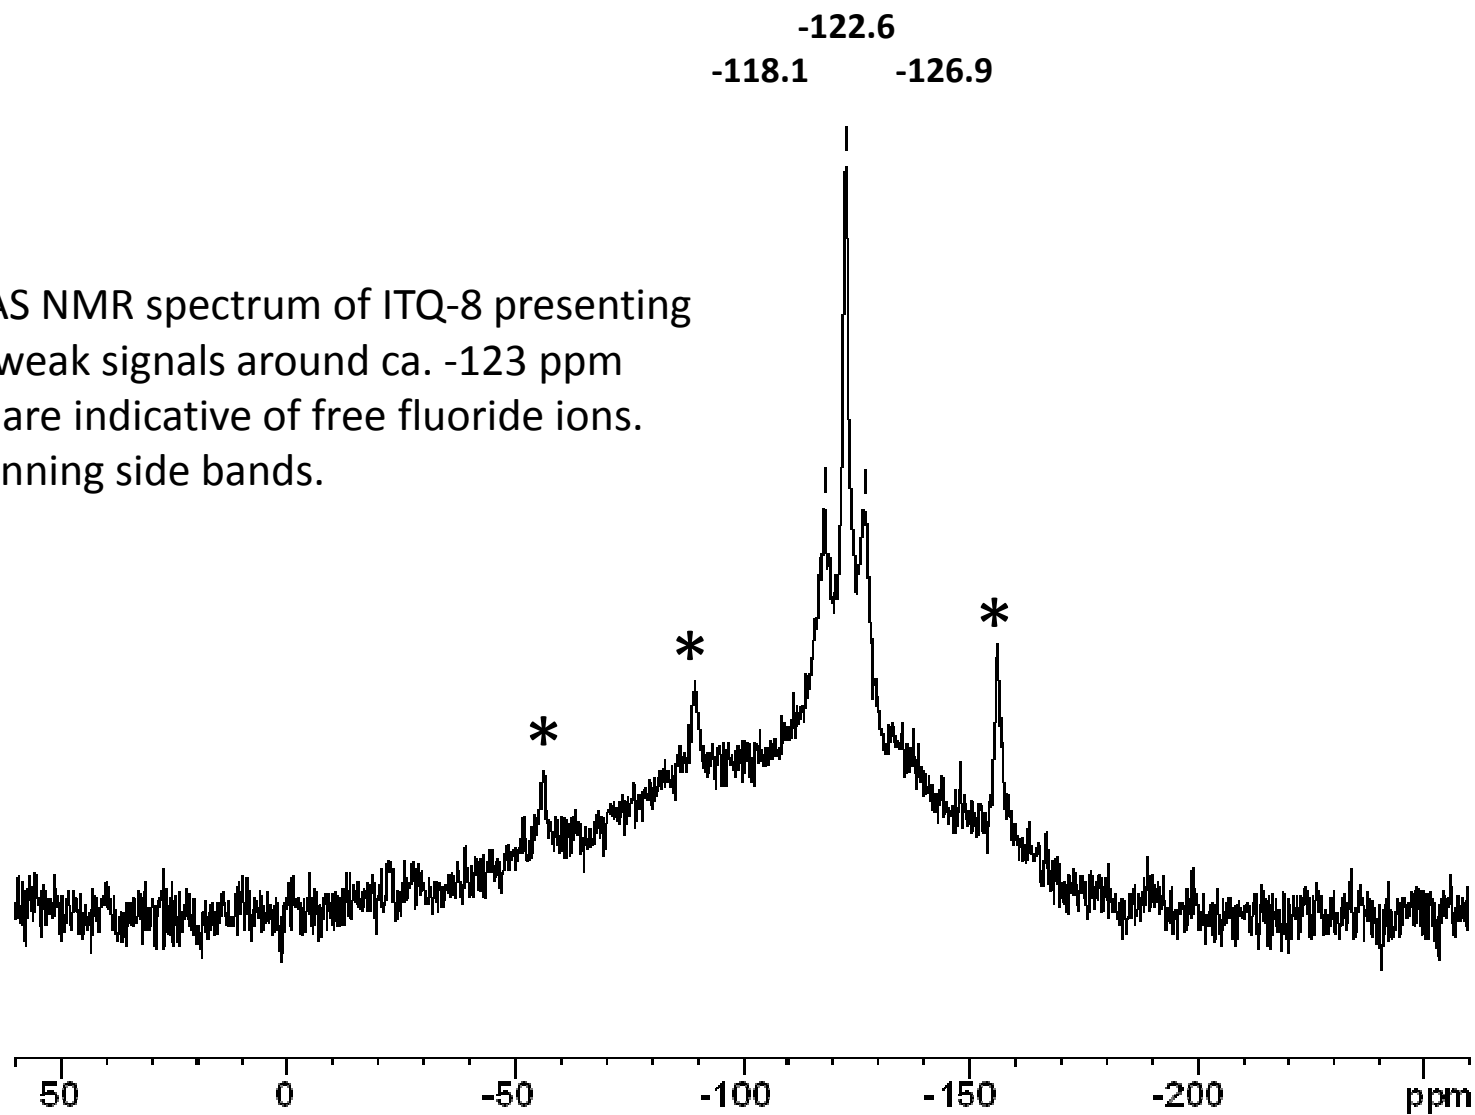

Supplement: c6dt00713a1.pdf [file c6dt00713a1.pdf]
